# Supplementary material for: Colorimetric and fluorogenic signalling of fluoride ions by diketopyrrolopyrrole-based chemosensor
Source: Royal Society of Chemistry journal article supplement (doi:10.1039/c4ra14639e), 2015-01-01
Supplement: c4ra14639e1.pdf [file c4ra14639e1.pdf]

## Supporting Information

### Colorimetric and fluorogenic signaling of fluoride ions by diketopyrrolopyrrole-based chemosensor

Xiaofeng Yang, Gege Zhang, Yexin Li, Zheng Liu, Xiaoqian Gong, Bin Gao, Guangyou Zhang, Yu Cui\* and Guoxin

Sun\*

#### CONTENTS:

##### General information

|                                                                                                                                                                                                                                                                                                        |     |
|--------------------------------------------------------------------------------------------------------------------------------------------------------------------------------------------------------------------------------------------------------------------------------------------------------|-----|
| <b>Fig. S1.</b> $^1\text{H}$ NMR spectrum of <b>3</b> -----                                                                                                                                                                                                                                            | S3  |
| <b>Fig. S2.</b> $^{13}\text{C}$ NMR spectrum of <b>3</b> -----                                                                                                                                                                                                                                         | S3  |
| <b>Fig. S3.</b> $^1\text{H}$ NMR spectrum of <b>2</b> -----                                                                                                                                                                                                                                            | S4  |
| <b>Fig. S4.</b> $^{13}\text{C}$ NMR spectrum of <b>2</b> -----                                                                                                                                                                                                                                         | S4  |
| <b>Fig. S5.</b> $^1\text{H}$ NMR spectrum of <b>1</b> in $\text{DMSO}-d_6$ -----                                                                                                                                                                                                                       | S5  |
| <b>Fig. S6.</b> $^{13}\text{C}$ NMR spectrum of <b>1</b> in $\text{DMSO}-d_6$ -----                                                                                                                                                                                                                    | S5  |
| <b>Fig. S7.</b> HRMS-ESI spectra of <b>1</b> -----                                                                                                                                                                                                                                                     | S6  |
| <b>Fig. S8.</b> $^1\text{H}-^1\text{H}$ cosygpsw spectroscopy of <b>1</b> in $\text{DMSO}-d_6$ -----                                                                                                                                                                                                   | S6  |
| <b>Fig. S9.</b> $^1\text{H}-^{13}\text{C}$ hsqcgp spectroscopy of <b>1</b> in $\text{DMSO}-d_6$ -----                                                                                                                                                                                                  | S7  |
| <b>Fig. S10.</b> (a) Comparison of partial $^1\text{H}$ NMR spectra of compounds <b>1</b> (in $\text{CDCl}_3$ ) and <b>2</b> (in $\text{DMSO}-d_6$ ). (b) Partial $^1\text{H}-^1\text{H}$ COSY and (c) $^1\text{H}-^{13}\text{C}$ HSQC NMR spectrum of compound <b>1</b> (in $\text{DMSO}-d_6$ ) ----- | S8  |
| <b>Fig. S11.</b> Job plot for sensor <b>1</b> with fluoride ion-----                                                                                                                                                                                                                                   | S9  |
| <b>Fig. S12.</b> Plot of association constant of sensor <b>1</b> with fluoride ion-----                                                                                                                                                                                                                | S10 |
| <b>Fig. S13.</b> The limit of detection of sensitivity of sensor <b>1</b> for fluoride ion-----                                                                                                                                                                                                        | S11 |
| <b>Fig. S14.</b> Time-dependent fluorescence changes of sensor <b>1</b> in the presence of $\text{F}^-$ -----                                                                                                                                                                                          | S12 |
| <b>Fig. S15.</b> (a) UV-vis absorption and (b) fluorescent spectra of sensor <b>1</b> ( $1 \times 10^{-5}$ M) to 0–90 equiv. fluoride ions in DMSO. Inset was enlarged spectra as 0–2 equiv. of $\text{F}^-$ was added-----                                                                            | S13 |
| <b>Fig. S16.</b> (a) UV-vis absorption and (b) fluorescent spectra of sensor <b>1</b> ( $1 \times 10^{-5}$ M) to various amounts of $\text{OH}^-$ (as $\text{Bu}_4\text{N}^+$ salts)-----                                                                                                              | S14 |
| <b>Fig. S17.</b> Partial $^1\text{H}$ NMR titration spectra of sensor <b>1</b> ( $4.7 \times 10^{-3}$ M) upon addition of increasing amounts of fluoride (TBAF) ion (0–5 equiv.) and $\text{F}^-$ alone (top) in $\text{DMSO}-d_6$ -----                                                               | S15 |
| <b>Fig. S18.</b> Partial $^{19}\text{F}$ NMR titration spectra of sensor <b>1</b> ( $4.7 \times 10^{-3}$ M) upon addition of increasing amounts of fluoride (TBAF) ion (0–5 equiv.) and $\text{F}^-$ alone (top) in $\text{DMSO}-d_6$ -----                                                            | S16 |
| <b>Fig. S19.</b> Quenching curve between sensor <b>1</b> and fluoride ion-----                                                                                                                                                                                                                         | S17 |
| <b>Fig. S20.</b> The emission spectra ( $\lambda_{\text{ex}} = 505$ nm) of sensor <b>1</b> ( $1 \times 10^{-5}$ M) in DMSO in the presence of different concentrations of $\text{OH}^-$ followed by the addition of 75 equiv. of fluoride anion in DMSO-----                                           | S18 |
| <b>Fig. S21.</b> UV-vis absorption spectra of <b>1</b> ( $1 \times 10^{-5}$ M) after addition of 75 equiv. of $\text{F}^-$ then 75 equiv. of various anions respectively-----                                                                                                                          | S18 |
| <b>Fig. S22.</b> Optimized geometries of sensor <b>1</b> and <b>1</b> - $2\text{F}^-$ complexes at the B3LYP/6–31G* level of theory. The selected bond distances (Å) of the corresponding species are shown-----                                                                                       | S19 |

## Experimental Section

### Determination of quantum yield

Fluorescence quantum yield of sensor **1** was determined in DMSO solution by using rhodamine B solution ( $\Phi_f = 0.36$ , 0.2  $\mu\text{M}$  H<sub>2</sub>O) as the reference <sup>[1]</sup>. The quantum yield was calculated using following equation:

$$\Phi_u = [(A_s F_u n^2) / (A_u F_s n_0^2)] \Phi_s.$$

Where  $A_s$  and  $A_u$  were the absorbance of the reference and sample solution at the reference excitation wavelength,  $F_s$  and  $F_u$  were the corresponding integrated fluorescence,  $n$  and  $n_0$  were the refractive indexes of the solvents for the sample and reference solutions. Absorbance of samples and references at their respective excitation wavelengths was controlled to be lower than 0.05.

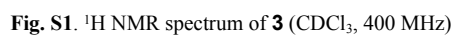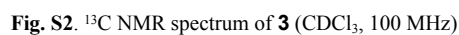

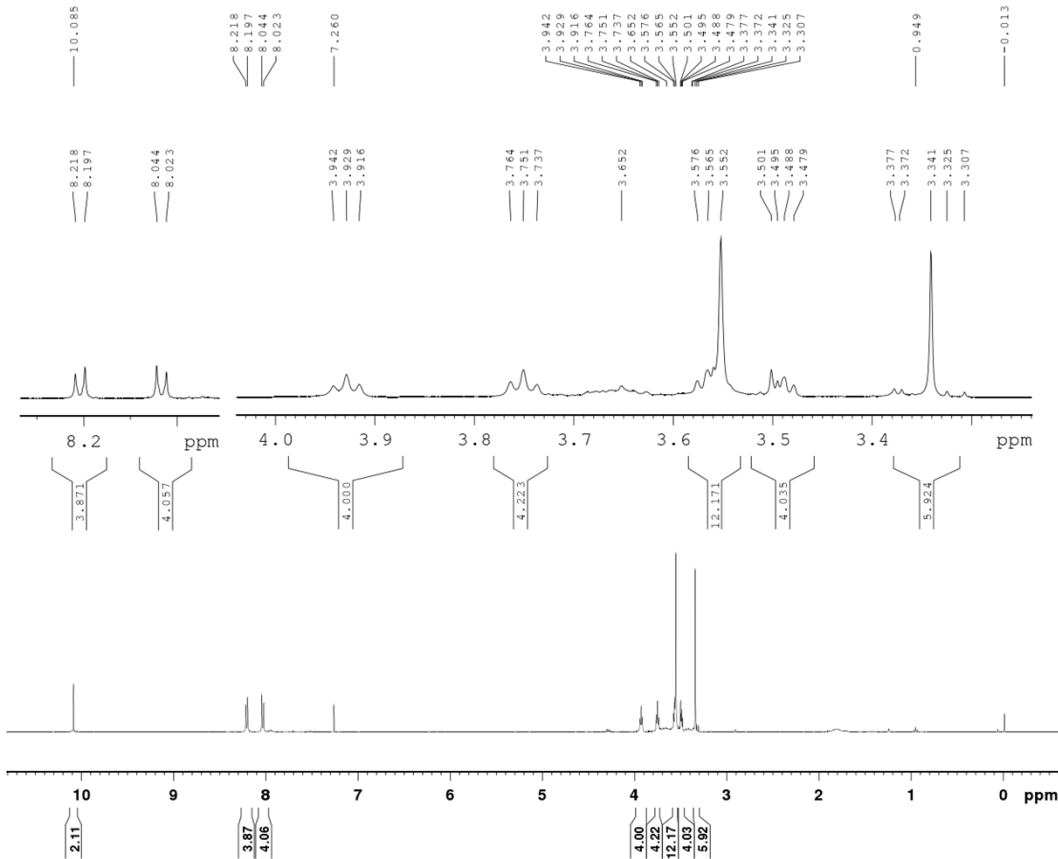

**Fig. S3.**  $^1\text{H}$  NMR spectrum of **2** ( $\text{CDCl}_3$ , 400 MHz)

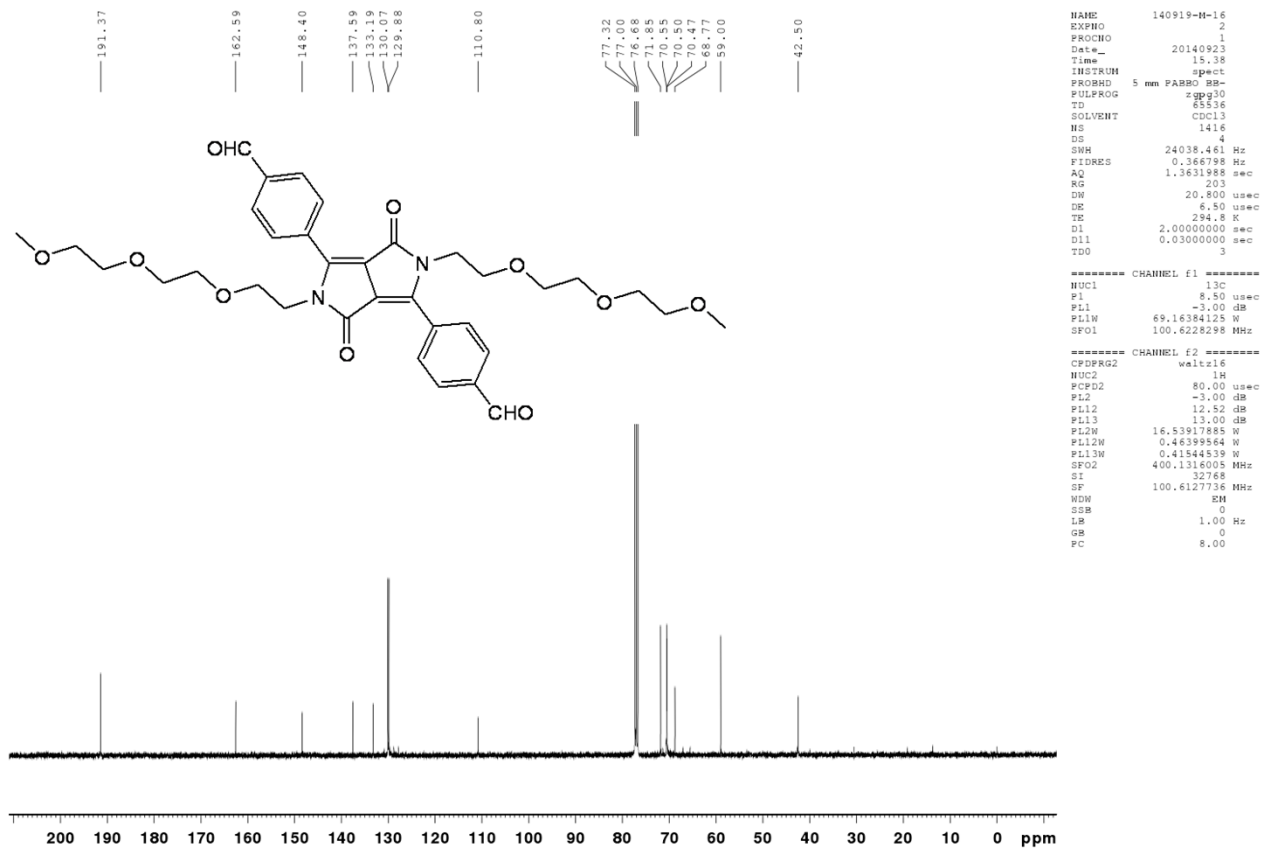

**Fig. S4.**  $^{13}\text{C}$  NMR spectrum of **2** ( $\text{CDCl}_3$ , 100 MHz)



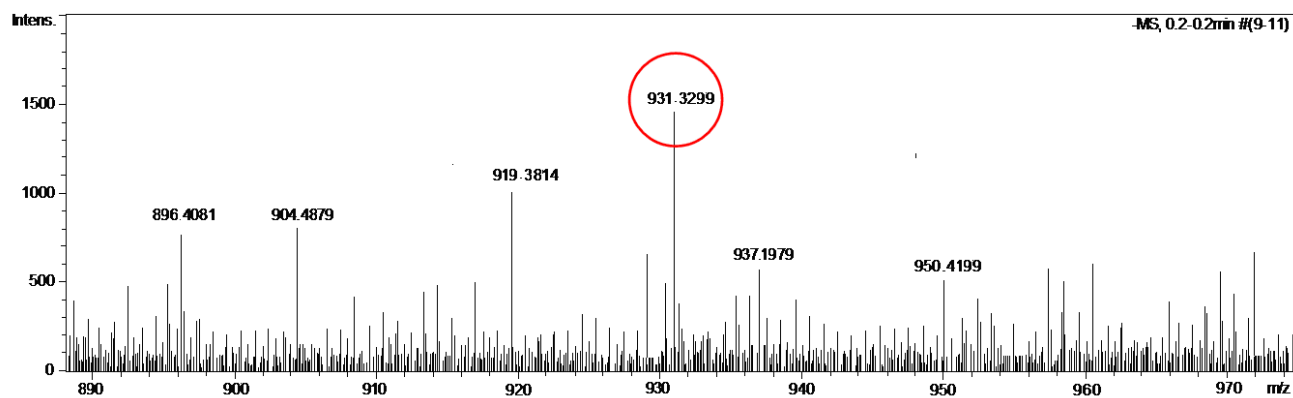

Fig. S7. HRMS-ESI spectra of **1**

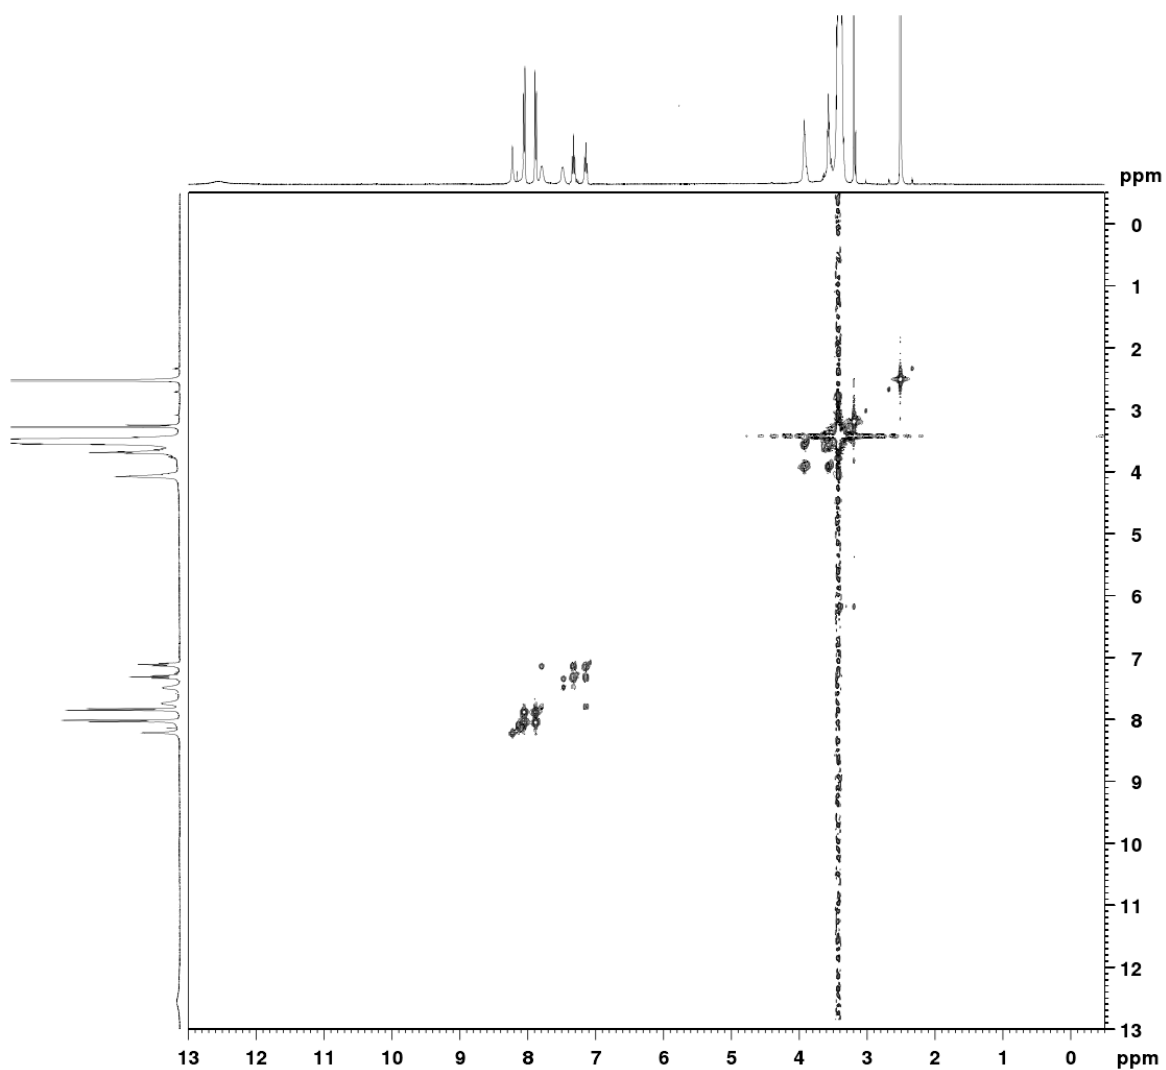

Fig. S8.  $^1\text{H}$ - $^1\text{H}$  COSY NMR spectrum of **1** ( $\text{DMSO}-d_6$ )

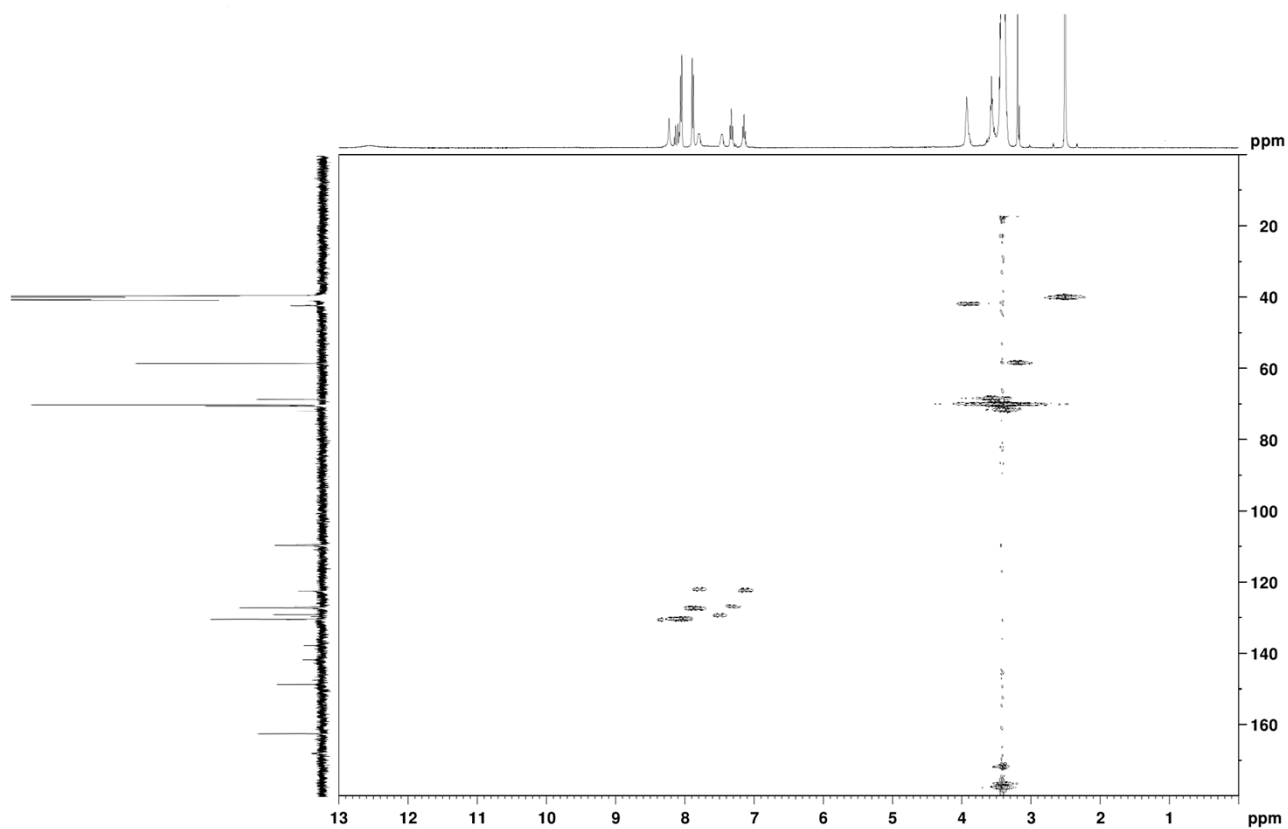

**Fig. S9.**  $^1\text{H}$ - $^{13}\text{C}$  HSQC NMR spectrum of **1** ( $\text{DMSO}-d_6$ ).

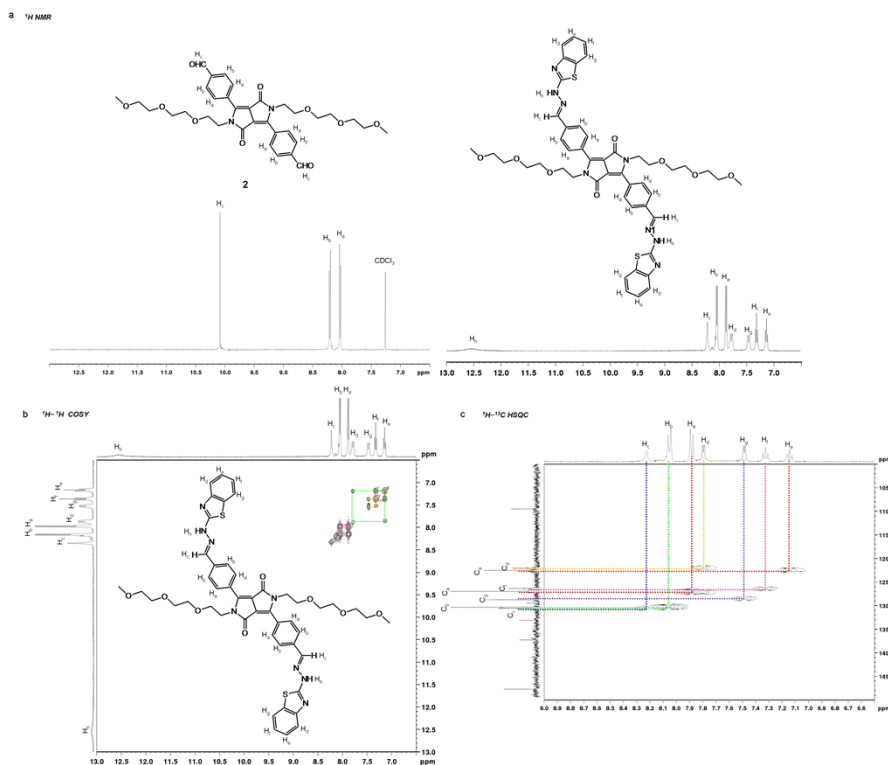

**Fig S10.** (a) Comparison of partial <sup>1</sup>H NMR spectra of compounds **1** (in CDCl<sub>3</sub>) and **2** (in DMSO-*d*<sub>6</sub>). (b) Partial <sup>1</sup>H-<sup>1</sup>H COSY NMR spectrum of compound **1** (in DMSO-*d*<sub>6</sub>). (c) Partial <sup>1</sup>H-<sup>13</sup>C HSQC NMR spectrum of compound **1** (in DMSO-*d*<sub>6</sub>).

Fig. S10 showed the comparison of <sup>1</sup>H NMR spectra of compounds **1** (in CDCl<sub>3</sub>) and **2** (in DMSO-*d*<sub>6</sub>), <sup>1</sup>H-<sup>1</sup>H COSY (in DMSO-*d*<sub>6</sub>) and <sup>1</sup>H-<sup>13</sup>C HSQC NMR (in DMSO-*d*<sub>6</sub>) spectrum of **1**. In <sup>1</sup>H NMR, compound **2** showed a signal at 10.09 ppm which was recognized as the aldehyde proton. However, this signal disappeared and six new signals developed in compound **1** (Fig. S10a). All protons in <sup>1</sup>H NMR spectrum of compound **1** were identified based on the coupling constants, peak integration, and cross-peak correlations observed between the resonances in <sup>1</sup>H-<sup>1</sup>H COSY and <sup>1</sup>H-<sup>13</sup>C HSQC spectra (Fig. S10b-c, respectively). In <sup>1</sup>H NMR spectrum of **1**, the doublet resonance at 7.79 ppm which was identified as *H<sub>a</sub>*-type aryl proton showed cross-peak correlation with triplet resonance at 7.14 ppm in <sup>1</sup>H-<sup>1</sup>H COSY spectrum which was identified as *H<sub>e</sub>*-type aryl proton. The triplet resonance at 7.14 ppm which was identified as *H<sub>e</sub>*-type aryl proton showed cross-peak correlation with triplet resonance at 7.32 ppm and doublet resonance at 7.79 ppm in COSY spectrum which were identified as *H<sub>f</sub>*-type and *H<sub>d</sub>*-type aryl protons, respectively. The *H<sub>f</sub>*-type resonance at 7.32 ppm showed cross-peak correlation with doublet resonance at 7.46 ppm and triplet resonance at 7.14 ppm in COSY spectrum which were identified as *H<sub>g</sub>*-type and *H<sub>e</sub>*-type aryl protons, respectively. The doublet resonance at 8.04 ppm which was identified as *H<sub>b</sub>*-type *meso*-aryl proton showed cross-peak correlation with doublet resonance at 7.87 ppm in <sup>1</sup>H-<sup>1</sup>H COSY spectrum which was identified as *H<sub>a</sub>*-type *meso*-aryl proton. The signals at 12.56 ppm and 8.22 ppm (which were identified as *H<sub>h</sub>*-type and *H<sub>c</sub>*-type protons, respectively) in <sup>1</sup>H NMR spectrum of **1** showed no cross-peak correlation in <sup>1</sup>H-<sup>1</sup>H COSY spectrum (Fig. S10b). To assign these two signals of **1**, a <sup>1</sup>H-<sup>13</sup>C HSQC NMR spectrum was measured. As shown in Fig. 1c, the signal at 8.22 ppm in <sup>1</sup>H NMR spectrum of **1** which was identified as *H<sub>c</sub>*-type proton showed cross-peak correlation with the signal at 130.2 ppm which was identified as *C<sub>e</sub>*-type carbon of hydrazone (CH=N-NH-) in <sup>1</sup>H-<sup>13</sup>C HSQC spectrum. And the signal at 12.56 ppm in <sup>1</sup>H NMR spectrum of **1** which was recognized as *H<sub>h</sub>*-type proton showed no cross-peak correlation in <sup>1</sup>H-<sup>13</sup>C HSQC spectra (Fig. S10c). From above analysis, the signal at 12.56 ppm in <sup>1</sup>H NMR spectrum of **1** was recognized as *H<sub>h</sub>*-type proton of hydrazone N-H adjacent to C=N bond (CH=N-NH-). Additionally, the aryl protons also identified similarly based on cross-peak correlations in <sup>1</sup>H-<sup>13</sup>C HSQC spectra. The signal at 122.1 ppm which was assigned as *C<sub>d</sub>*-type aryl carbon showed cross-peak correlation with a triplet at 7.79 ppm corresponding to *H<sub>a</sub>*-type proton. The signal at 122.4 ppm which was assigned as *C<sub>e</sub>*-type aryl carbon showed cross-peak correlation with triplet resonance at 7.14 ppm corresponding to *H<sub>e</sub>*-type proton. The signal at 126.6 ppm which was assigned as *C<sub>f</sub>*-type aryl carbon showed cross-peak correlation with a triplet at 7.32 ppm corresponding to *H<sub>f</sub>*-type proton. The signals at 127.0 ppm and 130.0 ppm (which were assigned as *C<sub>a</sub>*-type and *C<sub>b</sub>*-type aryl carbon, respectively) showed cross-peak correlation with two doublet resonance at 7.87 ppm and 8.04 ppm corresponding to *H<sub>a</sub>*-type and *H<sub>b</sub>*-type protons, respectively. The signal at 128.7 ppm which was assigned as *C<sub>g</sub>*-type aryl carbon showed cross-peak correlation with a doublet resonance at 7.46 ppm corresponding to *H<sub>g</sub>*-type proton. Thus, 1D and 2D NMR spectroscopy were very helpful in deducing the molecular structure of compound **1**.

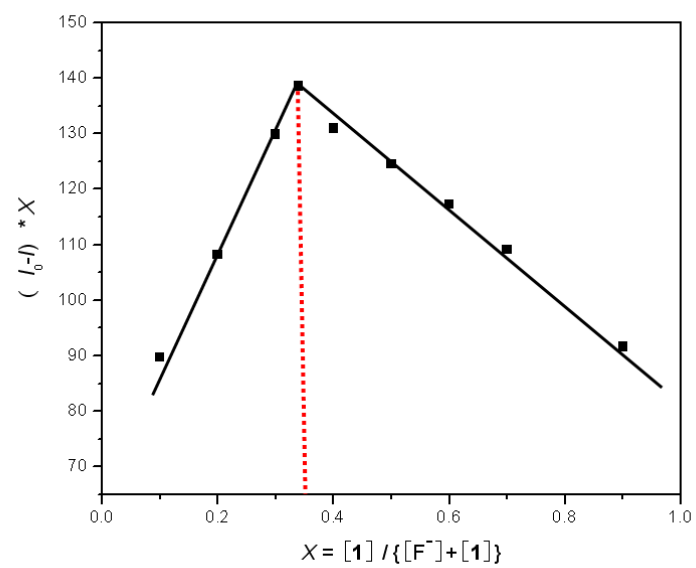

**Fig. S11.** Job's plot for the evolution of binding stoichiometry between **1** and  $F^-$  ion in DMSO solution. The total concentration of  $[F^-]$  and **1** was  $1.0 \times 10^{-5}$  M.

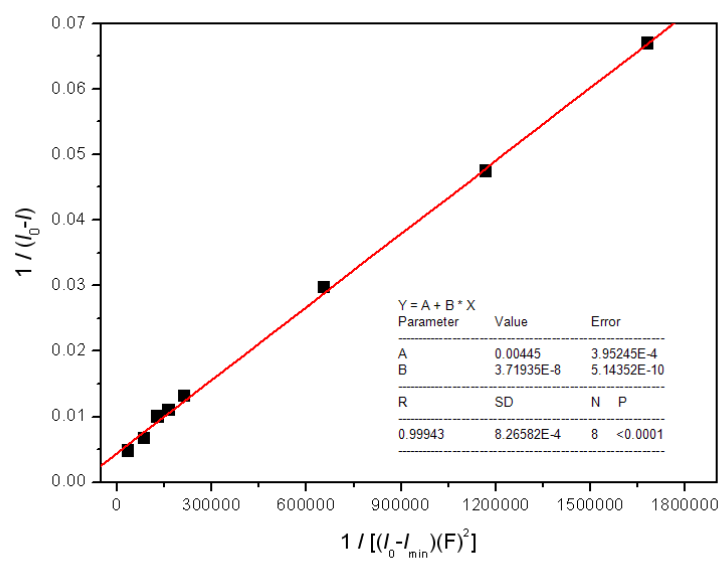

**Fig. S12.** Benesi–Hildebrand plot of sensor **1** ( $1.0 \times 10^{-5}$  M) using 1:2 stoichiometry for association between sensor **1** and fluoride ion.  $\lambda_{\text{ex}} = 505$  nm.

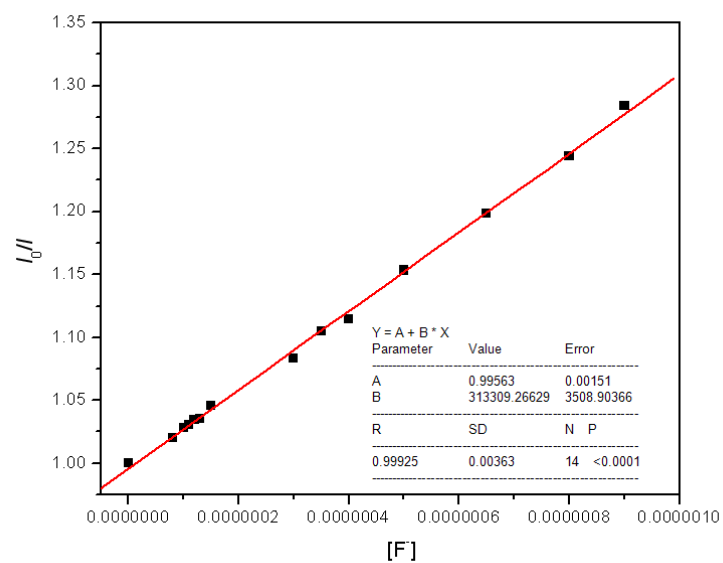

**Fig. S13.** The linear dynamic fluorescence response for the titration of sensor **1** with  $F^-$  to determine the limits of detection (LOD). The LOD was calculated using the formula  $3\sigma/k$ , where  $\sigma$  = standard deviation of blank (10 samples) and  $k$  = the slope of linear calibration curve.

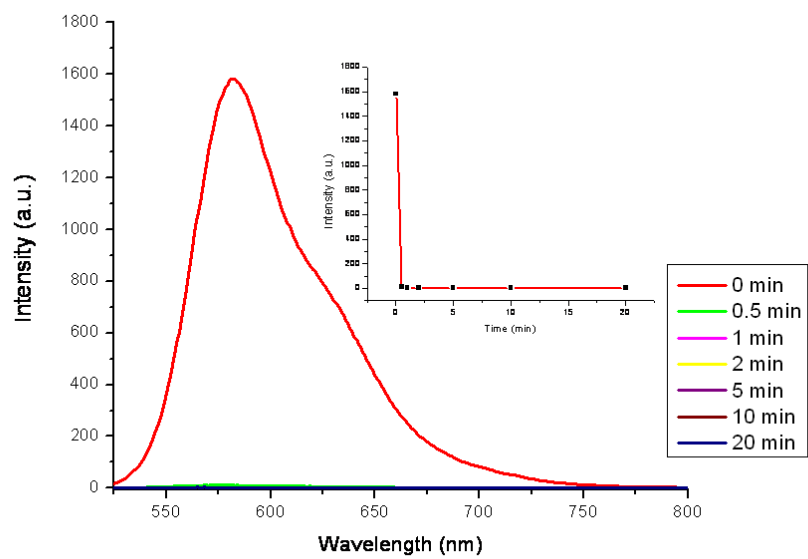

**Fig. S14.** Time-dependent fluorescence changes of sensor **1** ( $1 \times 10^{-5}$  M) in the presence of 75 equiv. of  $F^-$  in DMSO.  $\lambda_{\text{ex}} = 505$  nm.

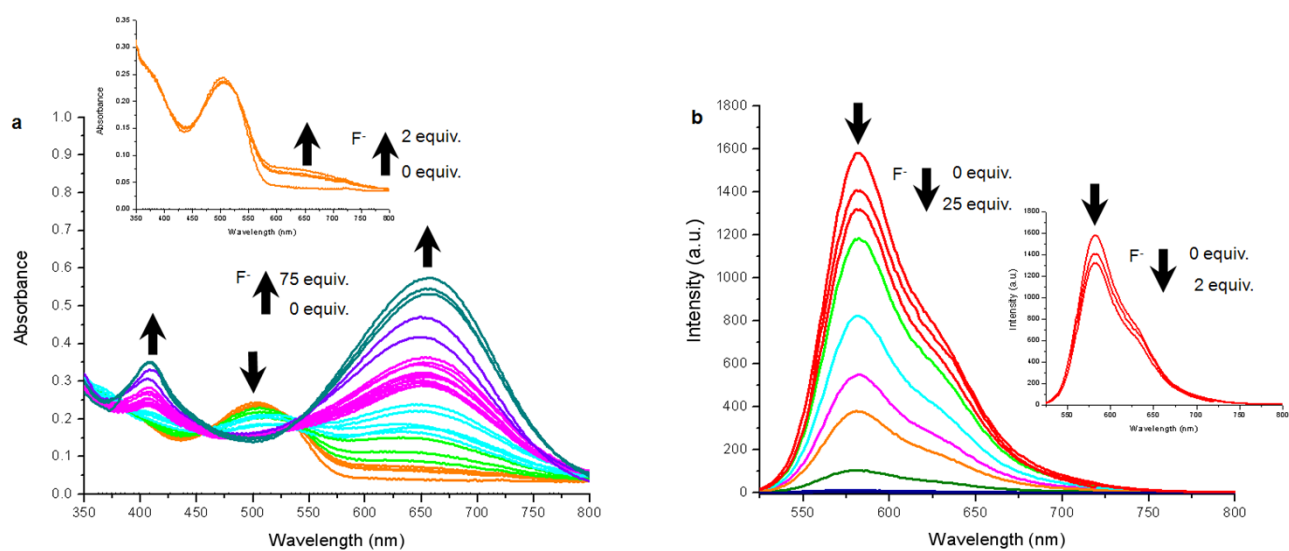

**Fig. S15.** (a) UV-vis absorption spectra of sensor **1** ( $1 \times 10^{-5}$  M) to 0–75 equiv. fluoride ions in DMSO. Inset was enlarged spectra as 0–2 equiv. of  $\text{F}^-$  was added. (b) Fluorescent spectra of sensor **1** ( $1 \times 10^{-5}$  M) to 0–25 equiv. fluoride ions in DMSO. Inset was enlarged spectra as 0–2 equiv. of  $\text{F}^-$  was added.  $\lambda_{\text{ex}}$  = 505 nm.

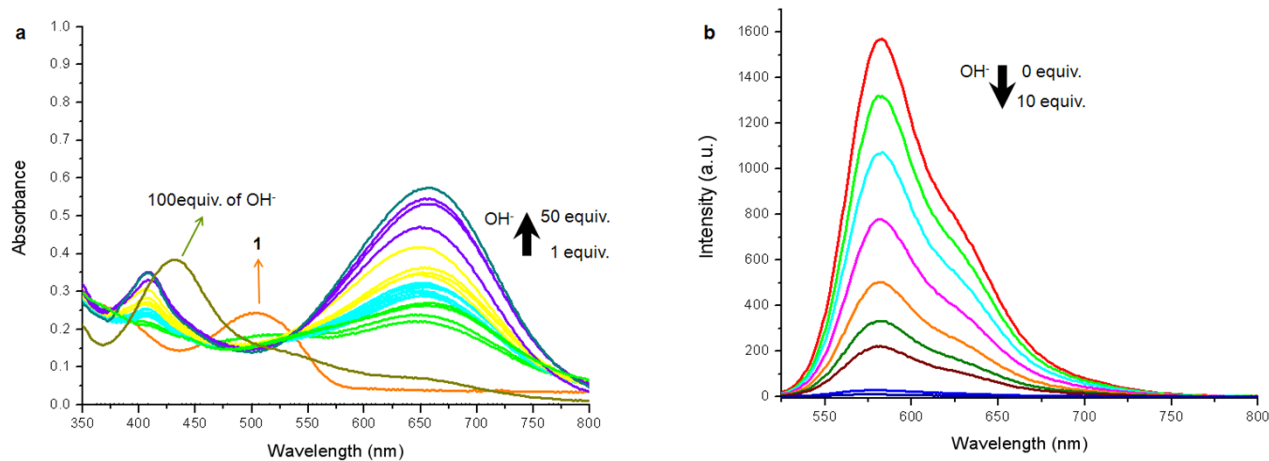

**Fig. S16.** (a) UV-vis absorption spectra of sensor **1** ( $1 \times 10^{-5}$  M) to various amounts of  $\text{OH}^-$  (as  $\text{Bu}_4\text{N}^+$  salts). (b) Fluorescent absorption spectra of sensor **1** ( $1 \times 10^{-5}$  M) to various amounts of  $\text{OH}^-$  (as  $\text{Bu}_4\text{N}^+$  salts).  $\lambda_{\text{ex}} = 505$  nm.

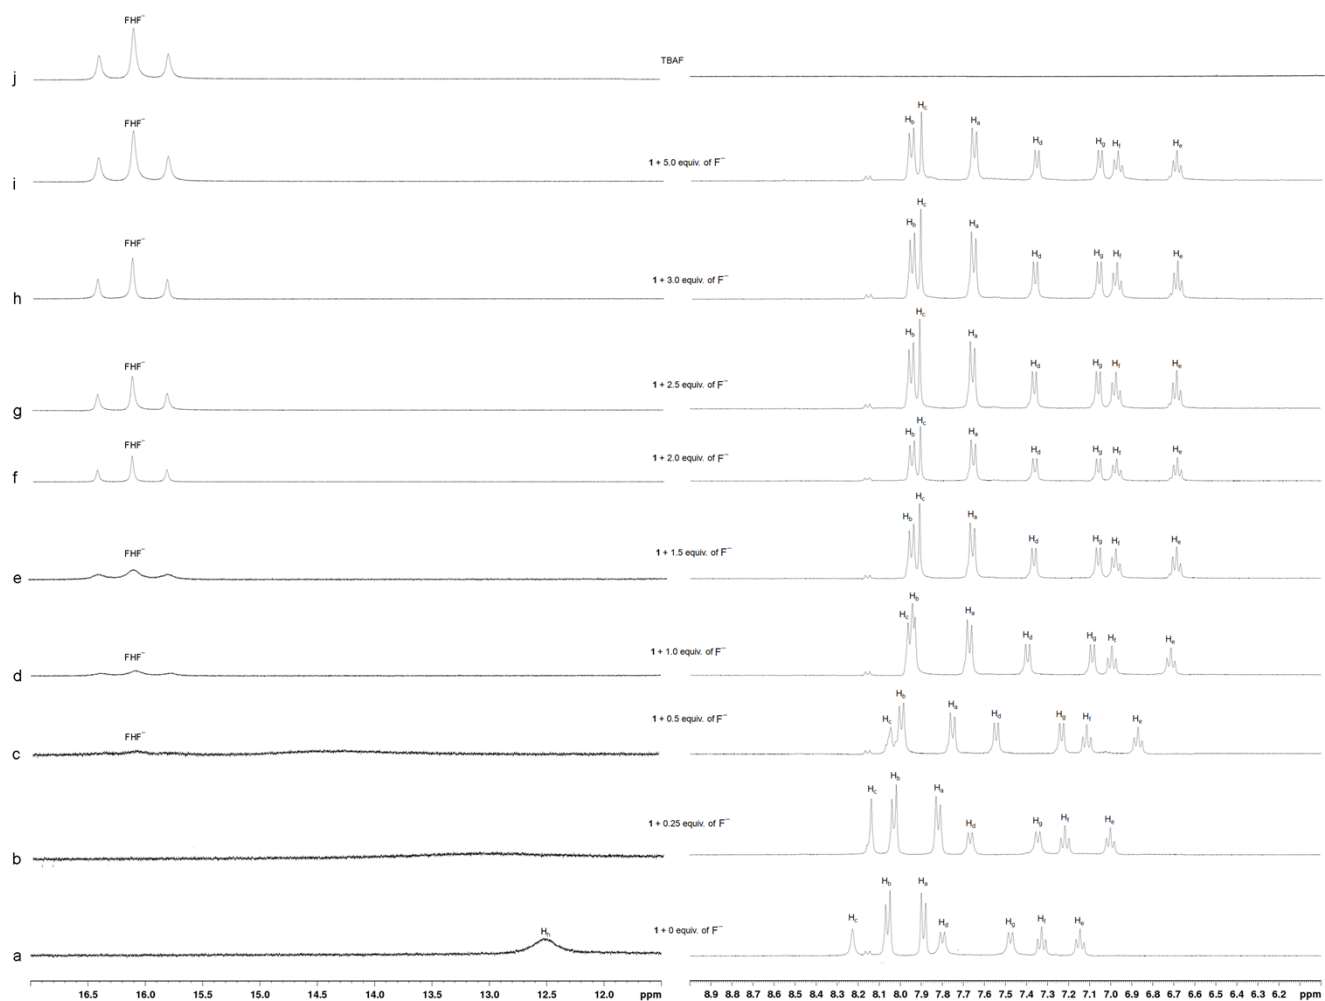

**Fig. S17.** Partial  $^1\text{H}$  NMR titration spectra of sensor **1** ( $4.7 \times 10^{-3}$  M) upon addition of increasing amounts of fluoride (TBAF) ion (0–5 equiv.) and  $\text{F}^-$  alone (top) in  $\text{DMSO}-d_6$ .

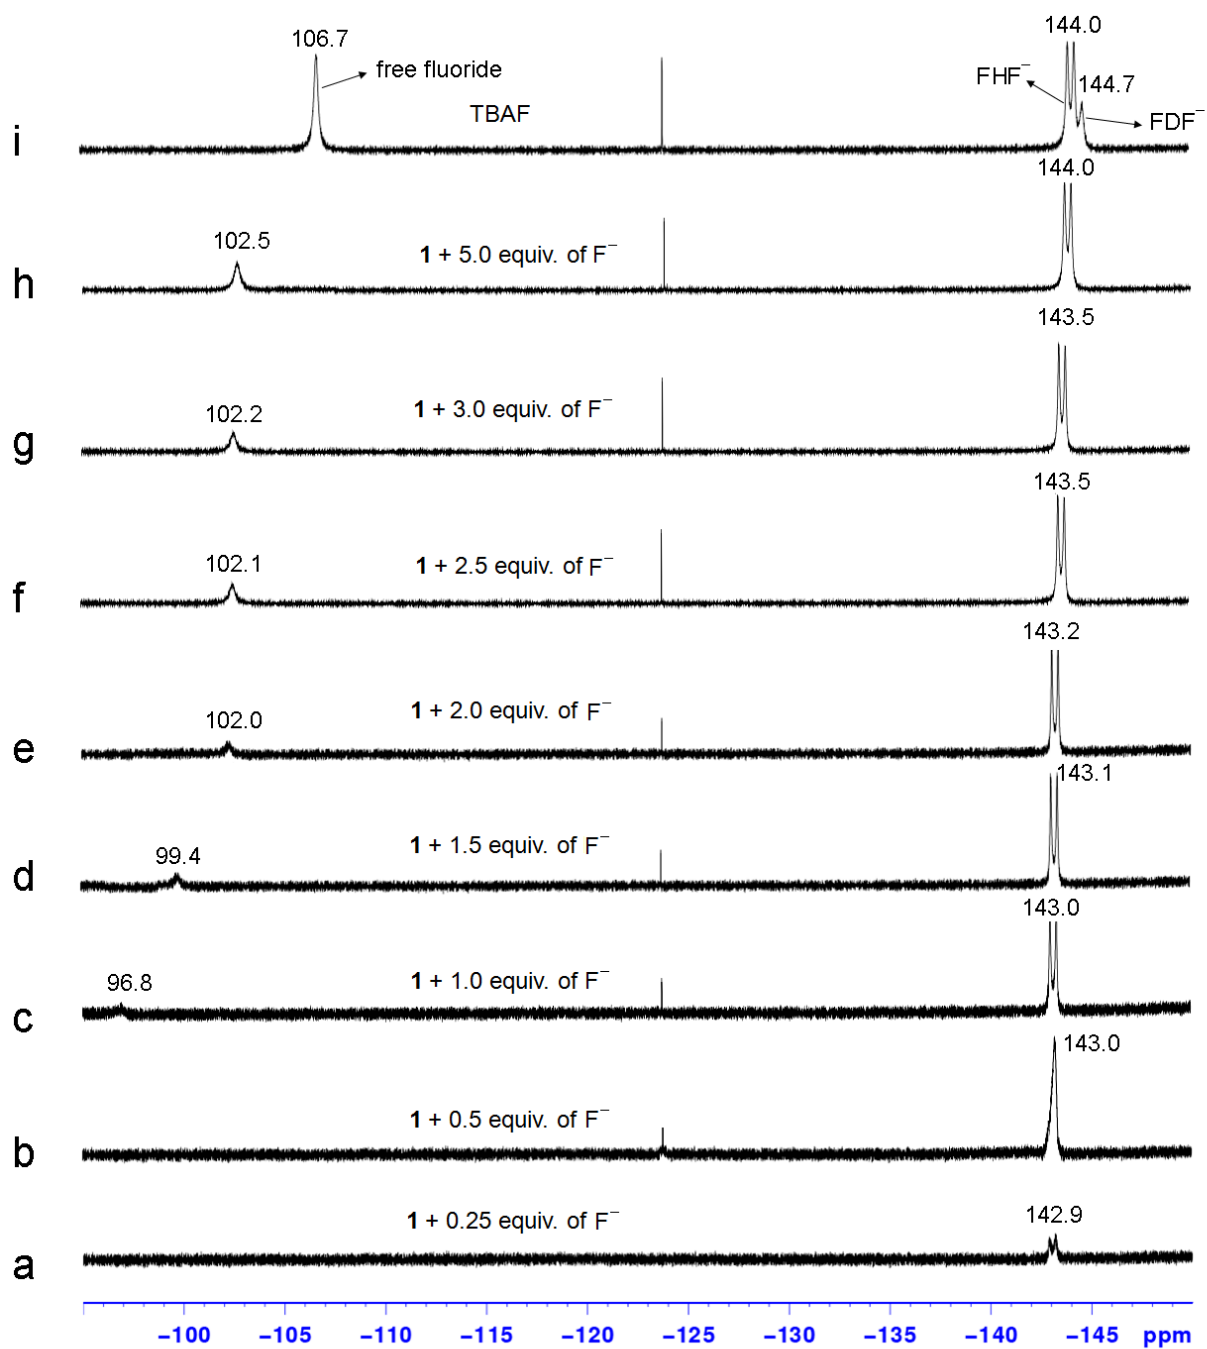

**Fig. S18.** Partial  $^{19}\text{F}$  NMR titration spectra of sensor **1** ( $4.7 \times 10^{-3}$  M) upon addition of increasing amounts of fluoride (TBAF) ion (0–5 equiv.) and  $\text{F}^-$  alone (top) in  $\text{DMSO}-d_6$ .

The quenching constant was calculated from the spectral titration data by the equation <sup>[2]</sup>:

$$\frac{1}{I_0 - I} = \frac{1}{I_0} + \frac{K_D}{I_0 [F]}$$

Where,  $I_0$  was the fluorescence intensity of sensor,  $I$  the fluorescence intensity obtained with fluoride ion,  $K_D$  the quenching constant,  $[F]$  the concentration of fluoride ion added. Linear fitting of the titration profiles resulted in a good linearity (correlation coefficient was over 0.99) (Fig. S19, Supporting information) and the quenching constant was calculated to be  $1.7 \times 10^{-3} \text{ M}^{-1}$  for **1**.

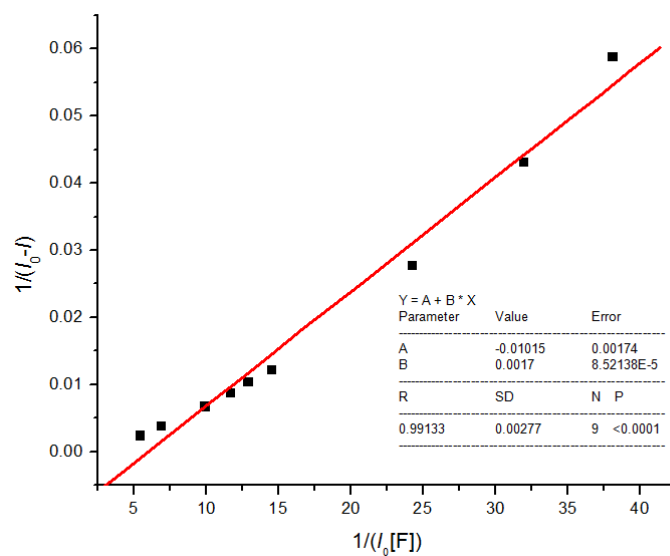

**Fig. S19.** Quenching curve between sensor **1** and fluoride ion.  $\lambda_{\text{ex}} = 505 \text{ nm}$ .

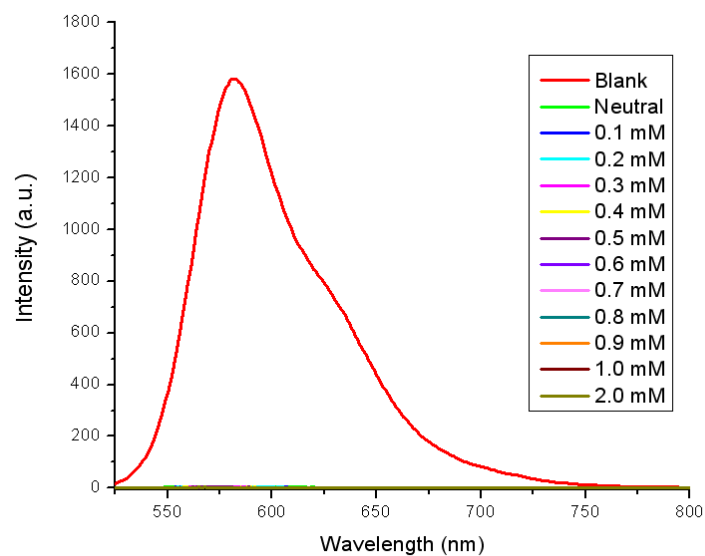

**Fig. S20.** The emission spectra ( $\lambda_{\text{ex}} = 505 \text{ nm}$ ) of sensor **1** ( $1 \times 10^{-5} \text{ M}$ ) in DMSO in the presence of different concentrations of  $\text{OH}^-$  followed by the addition of 75 equiv. of fluoride anion in DMSO.

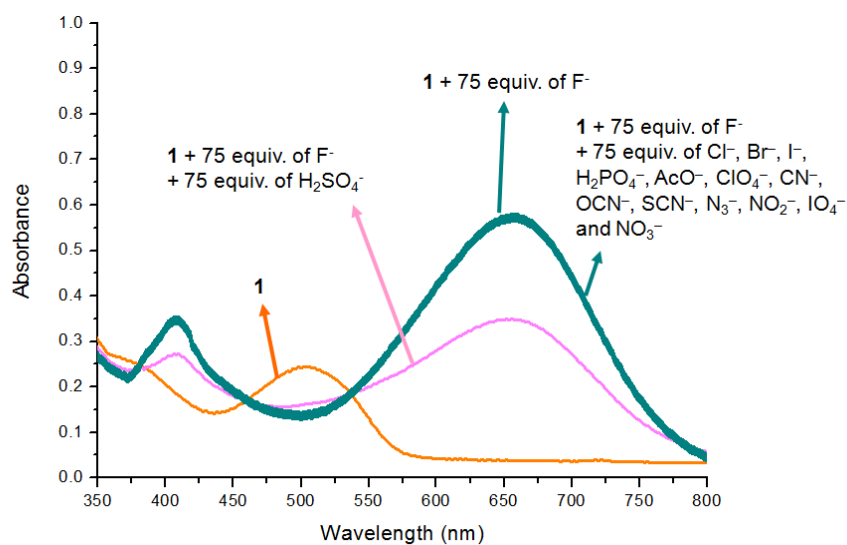

**Fig. S21.** UV-vis absorption spectra of **1** ( $1 \times 10^{-5} \text{ M}$ ) after addition of 75 equiv. of  $\text{F}^-$  then 75 equiv. of various anions respectively.

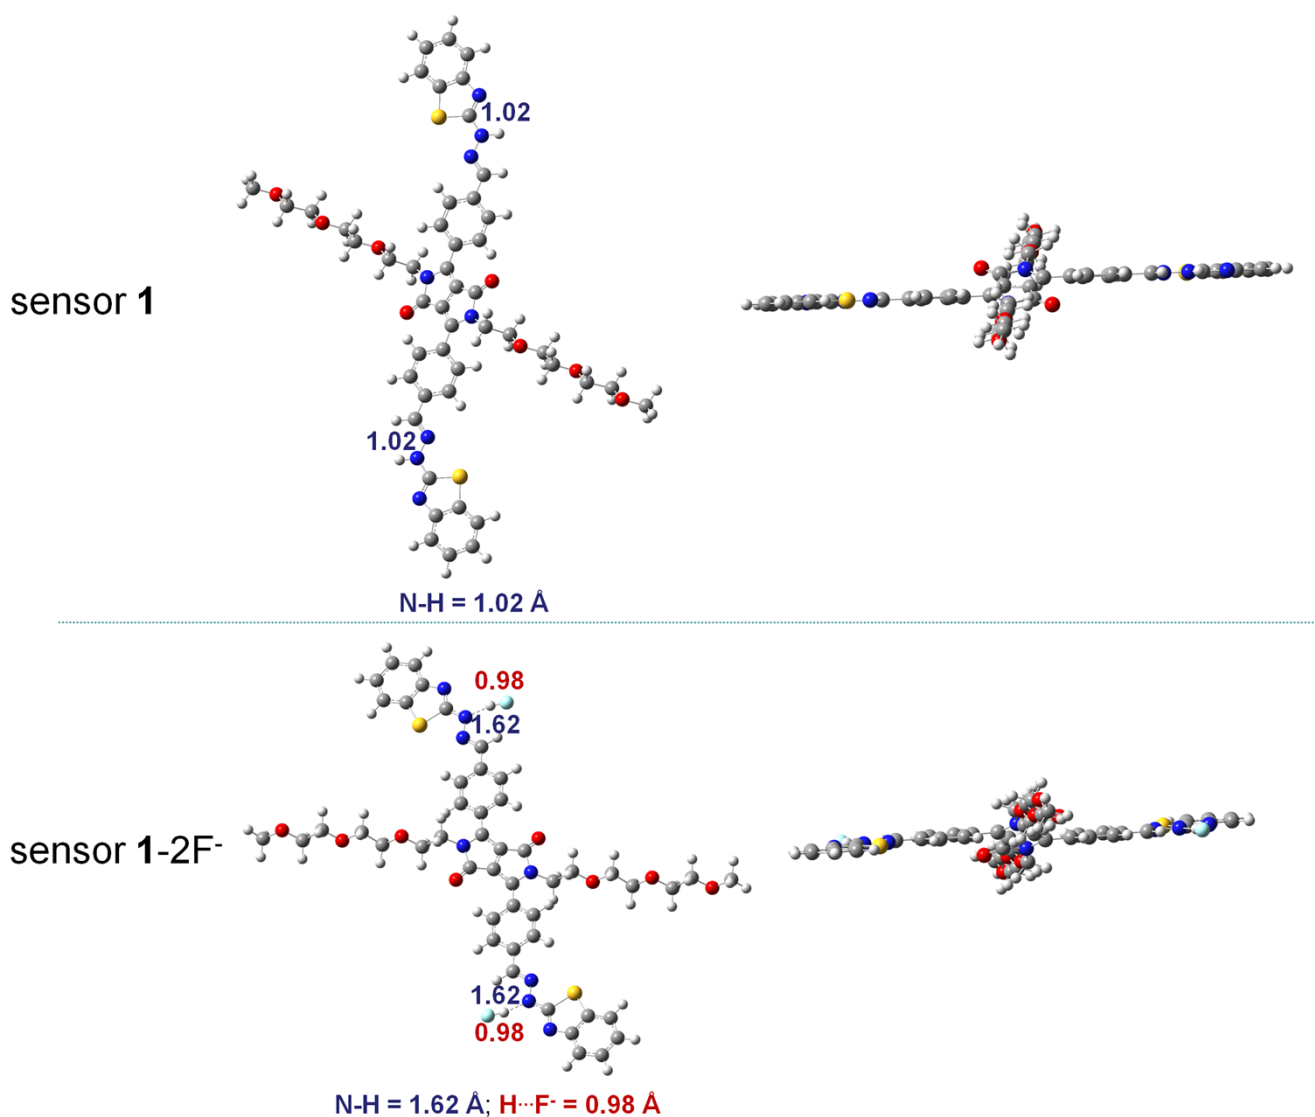

**Fig. S22.** Optimized geometries of sensor **1** and **1-2F<sup>-</sup>** complexes at the B3LYP/6-31G\* level of theory. The selected bond distances (Å) of the corresponding species are shown.

## References

- [1] X.-F. Zhang, Y. Zhang, L. Liu, *Journal of Luminescence*, 2014, **145**, 448.
- [2] M. M. Yang, P. Yang, L. W. Zhang, *Chinese Science Bulletin*, 1994, **39**, 31.
